# Supplementary material for: Weight-Bearing and Mobilization in the Postoperative Care of Ankle Fractures: A Systematic Review and Meta-Analysis of Randomized Controlled Trials and Cohort Studies
Source: PLoS One. 2015 Feb 19;10(2):e0118320. doi: 10.1371/journal.pone.0118320 (PMC4335061; doi:10.1371/journal.pone.0118320)
Supplement: S1 Table — Results which are not used in analyses are written in italics. Complications that are not directly related to the post-operative treatment regimen and the complications with an unknown group are also written in italics. + means yes/present; - means no/not present. (PDF) [file pone.0118320.s001.pdf]

**S1 Table** Characteristics of included studies

| Publication and study design                                                                             | Groups<br>(n = number of patients)                                                                                                                                                       | Weight-bearing | Mobilization | Protection |          |             | Outcome               | Results 6-12 weeks                            | Results ≥ 6 months                            | P value      | Complications                                                                                                                                 | Details bias assessment                                                                                                    |
|----------------------------------------------------------------------------------------------------------|------------------------------------------------------------------------------------------------------------------------------------------------------------------------------------------|----------------|--------------|------------|----------|-------------|-----------------------|-----------------------------------------------|-----------------------------------------------|--------------|-----------------------------------------------------------------------------------------------------------------------------------------------|----------------------------------------------------------------------------------------------------------------------------|
|                                                                                                          |                                                                                                                                                                                          |                |              | Cast       | Orthosis | Unprotected |                       |                                               |                                               |              |                                                                                                                                               |                                                                                                                            |
| <b>Ahl et al. 1986 [23] Randomized controlled trial</b>                                                  | (A) Late weight-bearing (starting from the fourth postoperative week) in a below-knee cast (n = 22)                                                                                      | -              | -            | +          | -        | -           | Olerud Molander score | Not reported                                  | Not reported                                  | Not reported | Group A: 2 older patients with osteoporosis revealed a redislocation of the lateral malleolus on radiograms                                   | The Olerud Molander score is mentioned in the methods but the results are not reported (high risk on selective reporting). |
|                                                                                                          | vs<br>(B) Early weight-bearing (starting from the first post-operative day) in a below-knee cast (n = 24)                                                                                | +              | -            | +          | -        | -           |                       |                                               |                                               |              |                                                                                                                                               |                                                                                                                            |
| <b>Ahl et al. 1987 [24] Randomized controlled trial</b>                                                  | (A) Late weight-bearing (starting from the fourth postoperative week) in a below-knee cast (n = 28)                                                                                      | -              | -            | +          | -        | -           | Olerud Molander score | Not reported                                  | Not reported                                  | Not reported | Group A (2) and Group B (6) cases of superficial wound infection or skin irritation<br>The difference between the 8 cases was not significant | The Olerud Molander score is mentioned in the methods but the results are not reported (high risk on selective reporting). |
|                                                                                                          | vs<br>(B) Immediate weight-bearing (starting from the first post-operative day) in a below-knee cast (n = 25)                                                                            | +              | -            | +          | -        | -           |                       |                                               |                                               |              |                                                                                                                                               |                                                                                                                            |
| <b>Ahl et al. 1988 [25] Randomized controlled trial and retrospective comparisons to Ahl et al. 1986</b> | (A) Ankle exercises without weight-bearing in a dorsal splint (n=25)                                                                                                                     | -              | +            | +          | -        | -           | Olerud Molander score | Not reported                                  | Not reported                                  | Not reported | No complications                                                                                                                              | The Olerud Molander score is mentioned in the methods but the results are not reported (high risk on selective reporting). |
|                                                                                                          | vs<br>(B) Ankle exercises with weight-bearing in an orthosis (n=26)<br>Both groups were initially treated with a plaster cast without weight-bearing during the first postoperative week | +              | +            | -          | +        | -           |                       |                                               |                                               |              |                                                                                                                                               |                                                                                                                            |
| <b>Ahl et al. 1993 [26] Randomized controlled trial and retrospective comparisons to Ahl et al. 1987</b> | (A) Ankle exercises without weight-bearing in a dorsal splint (n=19)                                                                                                                     | -              | +            | +          | -        | -           | Olerud Molander score | Group A = 53<br>Group B = 66<br>(at 3 months) | Group A = 76<br>Group B = 82<br>(at 6 months) | Not reported | Group B: 3 cases with superficial wound infection, 1 case with local wound necrosis and 1 case with skin irritation, caused by the orthosis   |                                                                                                                            |
|                                                                                                          | vs<br>(B) Ankle exercises with weight-bearing in an orthosis (n=21)                                                                                                                      | +              | +            | -          | +        | -           |                       |                                               |                                               | Not reported |                                                                                                                                               |                                                                                                                            |
|                                                                                                          | Both groups were initially treated with a plaster cast without weight-bearing during the first postoperative week                                                                        |                |              |            |          |             |                       |                                               |                                               | Not reported |                                                                                                                                               |                                                                                                                            |





| Publication and study design                                                                | Groups<br>(n = number of patients)                                                                   | Weight-bearing | Mobilization | Protection |          |             | Outcome                  | Results 6-12 weeks                                       | Results ≥ 6 months                                          | P value   | Complications                                                                                                                                                                                                                                                                                                                                                                                                                                                                                                   | Details bias assessment                                                                                                                                                                                                |
|---------------------------------------------------------------------------------------------|------------------------------------------------------------------------------------------------------|----------------|--------------|------------|----------|-------------|--------------------------|----------------------------------------------------------|-------------------------------------------------------------|-----------|-----------------------------------------------------------------------------------------------------------------------------------------------------------------------------------------------------------------------------------------------------------------------------------------------------------------------------------------------------------------------------------------------------------------------------------------------------------------------------------------------------------------|------------------------------------------------------------------------------------------------------------------------------------------------------------------------------------------------------------------------|
|                                                                                             |                                                                                                      |                |              | Cast       | Orthosis | Unprotected |                          |                                                          |                                                             |           |                                                                                                                                                                                                                                                                                                                                                                                                                                                                                                                 |                                                                                                                                                                                                                        |
| <b>Godsiff et al. 1993 [33]</b><br><b>Prospective study</b>                                 | (A) No early ankle exercises in a non-weight-bearing cast for 6 weeks (n = 20)                       | -              | -            | +          | -        | -           | ---                      | ---                                                      | ---                                                         | ---       | Not reported                                                                                                                                                                                                                                                                                                                                                                                                                                                                                                    | Weber A fractures are included (high risk on other bias).                                                                                                                                                              |
|                                                                                             | vs<br>(B) Early active and passive ankle exercises in a non-weight-bearing cast for 6 weeks (n = 27) | -              | +            | +          | -        | -           |                          |                                                          |                                                             |           |                                                                                                                                                                                                                                                                                                                                                                                                                                                                                                                 |                                                                                                                                                                                                                        |
| <b>Gul et al. 2007 [13]</b><br><b>Retrospective study</b>                                   | (A) Immobilization and non-weight-bearing in a plaster cast (n=25)                                   | -              | -            | +          | -        | -           | Olerud Molander score    | ---                                                      | Group A = 84<br>Group B = 82<br>(at an average 37,5 months) | p = 0.858 | Group A: 1 case with superficial wound infection<br>1 case with a pulmonary embolism<br>1 case with loss of internal fixation at one week which was re-operated<br>1 case with non-union who refused re-operation<br>Group B: 3 cases with superficial wound infection who were put in an ankle brace to limit dorsal and plantar flexion for 1-2 weeks but were allowed to continue with full weight-bearing<br>1 case of posttraumatic arthritis<br><br><i>Group B: 2 cases of syndesmotic screw breakage</i> | Weber A fractures are included (high risk on other bias).                                                                                                                                                              |
|                                                                                             | vs<br>(B) Immediate functional and full weight-bearing mobilization without a plaster cast (n=25)    | +              | +            | -          | -        | +           | Return to work (in days) | Group A = 91.3 (SD = 20.2)<br>Group B = 54.6 (SD = 15.5) | ---                                                         | p < 0.001 |                                                                                                                                                                                                                                                                                                                                                                                                                                                                                                                 |                                                                                                                                                                                                                        |
| <b>Harager et al. 2000 [34]</b><br><b>Partly prospective and partly retrospective study</b> | (A) Non-weight-bearing for 3 weeks followed by 3 weeks of weight-bearing (n = 73)                    | -              | -            | +          | -        | -           | ---                      | ---                                                      | ---                                                         | ---       | Group A: Not reported<br>Group B: 5 cases with a superficial wound infection<br>1 case with a slightly dislocated fracture<br>2 cases with a deep venous thrombosis                                                                                                                                                                                                                                                                                                                                             | The hospital stay is mentioned in the methods but the quantitative results are not reported (high risk on selective reporting). The complications of group A are also not reported (high risk on selective reporting). |
|                                                                                             | vs<br>(B) Immediate full weight-bearing in a below-knee walking cast (n = 62)                        | +              | -            | +          | -        | -           |                          |                                                          |                                                             |           |                                                                                                                                                                                                                                                                                                                                                                                                                                                                                                                 |                                                                                                                                                                                                                        |

| Publication and study design                                  | Groups<br>(n = number of patients)                                                                                                                                    | Weight-bearing | Mobilization | Protection |          |             | Outcome                           | Results 6-12 weeks                             | Results ≥ 6 months                              | P value                     | Complications                                                                                                                                | Details bias assessment                                   |
|---------------------------------------------------------------|-----------------------------------------------------------------------------------------------------------------------------------------------------------------------|----------------|--------------|------------|----------|-------------|-----------------------------------|------------------------------------------------|-------------------------------------------------|-----------------------------|----------------------------------------------------------------------------------------------------------------------------------------------|-----------------------------------------------------------|
|                                                               |                                                                                                                                                                       |                |              | Cast       | Orthosis | Unprotected |                                   |                                                |                                                 |                             |                                                                                                                                              |                                                           |
| <b>Hedström et al. 1994 [35] Randomized controlled trial</b>  | (A) Weight-bearing in a walking cast without ankle exercises (n=25)                                                                                                   | +              | -            | +          | -        | -           | Olerud Molander score             | Group A = 70<br>Group B = 80<br>(at 3 months)  |                                                 | Reported as not significant | Group A: 1 case with superficial wound infection<br>Group B: 2 cases with superficial wound infection<br><br>Group B: 4 cases with arthrosis |                                                           |
|                                                               | vs<br>(B) Weight-bearing in an orthosis with ankle exercises (n=28)                                                                                                   | +              | +            | -          | +        | -           |                                   |                                                | Group A = 85<br>Group B = 85<br>(at 6 months)   | Reported as not significant |                                                                                                                                              |                                                           |
|                                                               |                                                                                                                                                                       |                |              |            |          |             |                                   |                                                | Group A = 88<br>Group B = 100<br>(at 18 months) | Reported as not significant |                                                                                                                                              |                                                           |
| <b>Honigmann et al. 2007 [36] Randomized controlled trial</b> | (A) Functional postoperative treatment without external stabilization (full weight-bearing after 6 weeks) (a plaster of Paris splint was applied for 2-4 days) (n=22) | -              | +            | -          | -        | +           | Olerud Molander score (median)    | Group A = 42.5<br>Group B = 42<br>(at 6 weeks) | ---                                             | p = 0.46                    | No complications                                                                                                                             | Weber A fractures are included (high risk on other bias). |
|                                                               | vs<br>(B) Weight-bearing in a vacuum orthosis (vacoped) (full weight-bearing is allowed after 14 days) (n=23)                                                         | +              | +            | -          | +        | -           |                                   | Group A = 72<br>Group B = 69<br>(at 10 weeks)  | ---                                             | p = 0.55                    |                                                                                                                                              |                                                           |
|                                                               | Both groups had 15kg weight-bearing starting between 2 <sup>nd</sup> and 4 <sup>th</sup> postoperative day. Both groups had free ankle movements                      |                |              |            |          |             | Return to work (in days) (median) | Group A = 53<br>Group B = 37                   | ---                                             | p = 0.79                    |                                                                                                                                              |                                                           |
| <b>Laarhoven van et al. 1996 [37] Prospective study</b>       | (A) Non-weight-bearing functional unprotected mobilization and crutches (n=40)                                                                                        | -              | +            | -          | -        | +           | Olerud Molander score (median)    | Group A = 40<br>Group B = 45<br>(at 10 days)   | ---                                             | p = 0.47                    | Group A: 2 cases with a superficial wound infection<br>1 case with osteitis<br>Group B: 4 cases with a superficial wound infection           |                                                           |
|                                                               | vs<br>(B) Early weight-bearing in a below-knee walking plaster (n=41)                                                                                                 | +              | -            | +          | -        | -           |                                   | Group A = 50<br>Group B = 65<br>(at 6 weeks)   |                                                 | p = 0.02                    |                                                                                                                                              |                                                           |
|                                                               | Both groups were initially treated for two to five days with a plaster cast postoperatively                                                                           |                |              |            |          |             |                                   | Group A = 80<br>Group B = 85<br>(at 3 months)  |                                                 | p = 0.84                    |                                                                                                                                              |                                                           |
|                                                               |                                                                                                                                                                       |                |              |            |          |             |                                   |                                                | Group A = 95<br>Group B = 95<br>(at 1 year)     | p = 0.90                    |                                                                                                                                              |                                                           |
|                                                               |                                                                                                                                                                       |                |              |            |          |             | Return to work (in days) (median) | Group A = 79<br>Group B = 78                   | ---                                             | p = 0.54                    |                                                                                                                                              |                                                           |

| Publication and study design                                 | Groups<br>(n = number of patients)                                                                                                                                                                                                                                                                                                                                                                              | Weight-bearing | Mobilization | Protection |          |             | Outcome                  | Results 6-12 weeks                                                | Results ≥ 6 months                                              | P value                     | Complications                                                                                                                                                                           | Details bias assessment                                                                                                                 |
|--------------------------------------------------------------|-----------------------------------------------------------------------------------------------------------------------------------------------------------------------------------------------------------------------------------------------------------------------------------------------------------------------------------------------------------------------------------------------------------------|----------------|--------------|------------|----------|-------------|--------------------------|-------------------------------------------------------------------|-----------------------------------------------------------------|-----------------------------|-----------------------------------------------------------------------------------------------------------------------------------------------------------------------------------------|-----------------------------------------------------------------------------------------------------------------------------------------|
|                                                              |                                                                                                                                                                                                                                                                                                                                                                                                                 |                |              | Cast       | Orthosis | Unprotected |                          |                                                                   |                                                                 |                             |                                                                                                                                                                                         |                                                                                                                                         |
| <b>Lehtonen et al. 2003 [38] Randomized controlled trial</b> | (A) Below-knee plaster cast; after 2 weeks partial weight-bearing in a fibreglass short leg walking cast and full weight-bearing at 4 weeks (n=50)<br>vs<br>(B) Functional Air-Stirrup ankle brace (Aircast); after 2 weeks partial weight-bearing and full weight-bearing at 4 weeks (n=50)                                                                                                                    | +              | -            | +          | -        | -           | Olerud Molander score    | Group A = 54 (SD = 13)<br>Group B = 52 (SD = 14)<br>(at 6 weeks)  |                                                                 | Reported as not significant | Group A: 4 cases with a superficial wound infection<br>2 cases with a deep-vein thrombosis<br>1 case with chronic dysesthesia of the skin                                               | Weber A fractures are included (high risk on other bias).                                                                               |
|                                                              |                                                                                                                                                                                                                                                                                                                                                                                                                 | +              | +            | -          | +        | -           |                          | Group A = 75 (SD = 14)<br>Group B = 75 (SD = 13)<br>(at 12 weeks) |                                                                 | Reported as not significant | Group B: 16 cases with a superficial wound infection<br>4 cases with a deep wound infection                                                                                             |                                                                                                                                         |
|                                                              |                                                                                                                                                                                                                                                                                                                                                                                                                 |                |              |            |          |             |                          |                                                                   | Group A = 89 (SD = 8)<br>Group B = 88 (SD = 9)<br>(at 52 weeks) | Reported as not significant | 3 cases with dehiscence of the wound<br>3 cases with chronic dysesthesia                                                                                                                |                                                                                                                                         |
|                                                              |                                                                                                                                                                                                                                                                                                                                                                                                                 |                |              |            |          |             |                          |                                                                   | Group A = 87 (SD = 8)<br>Group B = 87 (SD = 9)<br>(at 2 years)  | Reported as not significant | 1 case with local skin necrosis<br>1 case with chronic allodynia<br>1 case with loss of internal fixation                                                                               |                                                                                                                                         |
|                                                              |                                                                                                                                                                                                                                                                                                                                                                                                                 |                |              |            |          |             | Return to work (in days) | Group A = 63 (SD = 13)<br>Group B = 65 (SD = 19)                  | ---                                                             | Reported as not significant | 1 case with refracture of the lateral malleolus<br><br>Group A: 1 case with chronic skin irritation<br>Group B: 2 cases with chronic skin irritation<br>1 case with postspinal headache |                                                                                                                                         |
| <b>Lund-Kristensen et al. 1981 [39] Prospective study</b>    | (A) Dorsal plaster-of-Paris splint for 2 to 10 days (average 3 days) with ankle exercises after removal of the dorsal splint (n=10)<br>vs<br>(B) Plaster-of-Paris cast (for 4 to 6 weeks postoperative); as soon as possible the patients were mobilized using crutches (n=3)<br>vs<br>(C) Without any external fixation with ankle exercises (n=15)<br>All groups became weight-bearing on average at 9 weeks. | -              | -            | +          | -        | -           | ---                      | ---                                                               | ---                                                             | ---                         | Group unknown: 1 case with a small abscess over a loose screw<br>1 case with pes equines                                                                                                | Weber A fractures are included (high risk on other bias).<br>Very low number of patients (n=28) are included (high risk on other bias). |
|                                                              |                                                                                                                                                                                                                                                                                                                                                                                                                 | -              | +            | +          | -        | -           |                          |                                                                   |                                                                 |                             |                                                                                                                                                                                         |                                                                                                                                         |
|                                                              |                                                                                                                                                                                                                                                                                                                                                                                                                 | -              | +            | -          | -        | +           |                          |                                                                   |                                                                 |                             |                                                                                                                                                                                         |                                                                                                                                         |
| <b>Richter et al. 1996 [40] Prospective study</b>            | (A) Plaster immobilization (non-weight-bearing) (n=19)<br>vs<br>(B) Early mobilization (n=42)                                                                                                                                                                                                                                                                                                                   | -              | -            | +          | -        | -           | Olerud Molander score    | ---                                                               | Group A = 85.0<br>Group B = 92.4<br>(on average at 17,3 months) | Not reported                | No complications                                                                                                                                                                        | Children are included (high risk on other bias).                                                                                        |
|                                                              |                                                                                                                                                                                                                                                                                                                                                                                                                 | -              | +            | -          | -        | -           |                          |                                                                   |                                                                 |                             |                                                                                                                                                                                         |                                                                                                                                         |

| Publication and study design                                                                 | Groups<br>(n = number of patients)                                                                                                                                                                                                                                                                                                                           | Weight-bearing | Mobilization | Protection |          |             | Outcome                        | Results 6-12 weeks                                                        | Results ≥ 6 months                                                          | P value                     | Complications                                                                                                                                                                                                                                                            | Details bias assessment                                                                                                                                                                                                              |
|----------------------------------------------------------------------------------------------|--------------------------------------------------------------------------------------------------------------------------------------------------------------------------------------------------------------------------------------------------------------------------------------------------------------------------------------------------------------|----------------|--------------|------------|----------|-------------|--------------------------------|---------------------------------------------------------------------------|-----------------------------------------------------------------------------|-----------------------------|--------------------------------------------------------------------------------------------------------------------------------------------------------------------------------------------------------------------------------------------------------------------------|--------------------------------------------------------------------------------------------------------------------------------------------------------------------------------------------------------------------------------------|
|                                                                                              |                                                                                                                                                                                                                                                                                                                                                              |                |              | Cast       | Orthosis | Unprotected |                                |                                                                           |                                                                             |                             |                                                                                                                                                                                                                                                                          |                                                                                                                                                                                                                                      |
| <b>Siddique et al. 2005 [41]</b><br><b>Prospective study</b>                                 | (A) Immobilization in a below-knee plaster cast (n=22)<br>vs<br>(B) Mobilization without a cast (n=22)<br>Both groups were treated with partial weight-bearing at 4 weeks and gradually progressed to full weight-bearing                                                                                                                                    | -              | -            | +          | -        | -           | Olerud Molander score          | Group A = 33.0 (SD = 19.0)<br>Group B = 39.2 (SD = 19.5)<br>(at 6 weeks)  | ---                                                                         | p = 0.29                    | Not reported                                                                                                                                                                                                                                                             |                                                                                                                                                                                                                                      |
|                                                                                              |                                                                                                                                                                                                                                                                                                                                                              | -              | +            | -          | -        | +           |                                | Group A = 67.5 (SD = 21.9)<br>Group B = 69.5 (SD = 22.5)<br>(at 12 weeks) | ---                                                                         | p = 0.76                    |                                                                                                                                                                                                                                                                          |                                                                                                                                                                                                                                      |
| <b>Simanski et al. 2006 [42]</b><br><b>Partly prospective and partly retrospective study</b> | (A) Immobilization (no functional treatment) in a below-knee plaster cast without weight-bearing (starting in a below-knee splint until ankle swelling was reduced) (n=23)<br>vs<br>(B) Early functional (active and passive ankle exercises) treatment in a brace (aircast) with immediate partial weight-bearing; full weight-bearing after 3 weeks (n=23) | -              | -            | +          | -        | -           | Olerud Molander score          | ---                                                                       | Group A = 79 (SD = 19)<br>Group B = 87 (SD = 14)<br>(at least at 12 months) | p = 0.25                    | Group A: 1 case with pseudarthrosis of the fibula<br>2 cases with superficial wound infection<br>1 case with reflex sympathetic dystrophy (p = 0.66)<br>Group B: 1 case with reflex sympathetic dystrophy<br>1 case with an allergic reaction to the chrome-nickel plate |                                                                                                                                                                                                                                      |
|                                                                                              |                                                                                                                                                                                                                                                                                                                                                              | +              | +            | -          | +        | -           | Return to work (in days)       | Group A = 75.6 (SD = 49.0)<br>Group B = 64.4 (SD = 38.5)                  |                                                                             | p = 0.63                    |                                                                                                                                                                                                                                                                          |                                                                                                                                                                                                                                      |
| <b>Søndenaa et al. 1986 [43]</b><br><b>Randomized controlled trial</b>                       | (A) Non-weight-bearing immobilization in a plaster cast (n=23)<br>vs<br>(B) Unprotected non-weight-bearing with active ankle exercises (after 3 days of pain immobilization in a plaster slab) (n=20)<br>Both groups were allowed full weight-bearing after 6 weeks                                                                                          | -              | -            | +          | -        | -           | ---                            | ---                                                                       | ---                                                                         | ---                         | Group B: 1 case with a superficial wound infection                                                                                                                                                                                                                       | Weber A fractures are included (high risk on other bias).                                                                                                                                                                            |
|                                                                                              |                                                                                                                                                                                                                                                                                                                                                              | -              | +            | -          | -        | +           |                                |                                                                           |                                                                             |                             |                                                                                                                                                                                                                                                                          |                                                                                                                                                                                                                                      |
| <b>Tropp et al. 1995 [44]</b><br><b>Randomized controlled trial</b>                          | (A) Immobilization in a plaster cast (n = 15)<br>vs<br>(B) Early mobilization in an ankle brace (n = 15)<br>In both groups weight-bearing was allowed                                                                                                                                                                                                        | +              | -            | +          | -        | -           | Modified Olerud Molander score | Group A = 70 (SD = 21)<br>Group B = 77 (SD = 19)<br>(at 10 weeks)         |                                                                             | Reported as not significant | Group A: no complications<br>Group B: 1 case with a wound with slight secretion                                                                                                                                                                                          | Very low number of patients (n=30) are included (high risk on other bias).<br>The total number of patients is reported, but not how many of these patients are assigned to the different treatment groups (high risk on other bias). |
|                                                                                              |                                                                                                                                                                                                                                                                                                                                                              | +              | +            | -          | +        | -           |                                |                                                                           | Group A = 88 (SD = 22)<br>Group B = 92 (SD = 10)<br>(at 12 months)          | Reported as not significant |                                                                                                                                                                                                                                                                          |                                                                                                                                                                                                                                      |

| Publication and study design                                                                    | Groups<br>(n = number of patients)                                                                                                                                                                                          | Weight-bearing | Mobilization | Protection |          |             | Outcome                  | Results 6-12 weeks                                                                        | Results ≥ 6 months | P value                     | Complications                                                                                                                                                                                                                                                                              | Details bias assessment |
|-------------------------------------------------------------------------------------------------|-----------------------------------------------------------------------------------------------------------------------------------------------------------------------------------------------------------------------------|----------------|--------------|------------|----------|-------------|--------------------------|-------------------------------------------------------------------------------------------|--------------------|-----------------------------|--------------------------------------------------------------------------------------------------------------------------------------------------------------------------------------------------------------------------------------------------------------------------------------------|-------------------------|
|                                                                                                 |                                                                                                                                                                                                                             |                |              | Cast       | Orthosis | Unprotected |                          |                                                                                           |                    |                             |                                                                                                                                                                                                                                                                                            |                         |
| <b>Vioreanu et al. 2007 [45]</b><br><b>Prospective study</b>                                    | (A) Immobilization in a below-knee nonremovable fibreglass cast (non-weight-bearing) (n=29)                                                                                                                                 | -              | -            | +          | -        | -           | Olerud Molander score    | Group A = 63.75 (SD = 9.19)<br>Group B = 79.92 (SD = 11.32)<br>(at 9 weeks)               | ---                | p < 0.05                    | Group A: 2 cases with deep vein thrombosis of popliteal vein<br>Group B: 1 case with a superficial wound infection<br>1 case with break down and subsequent infection of the wound which needed removal of hardware<br>1 case with a deep wound infection which needed removal of hardware |                         |
|                                                                                                 | vs<br>(B) Early mobilization in a removable fibreglass cast with active and passive ankle exercises (non-weight-bearing) (n=33)<br>Both groups were initially treated for 10 to 14 days in a dorsal plaster of Paris splint | -              | +            | +          | -        | -           |                          | <i>Group A = 81.07 (SD = 9.56)</i><br><i>Group B = 93.17 (SD = 8.76)</i><br>(at 12 weeks) | ---                | Reported as not significant |                                                                                                                                                                                                                                                                                            |                         |
|                                                                                                 |                                                                                                                                                                                                                             |                |              |            |          |             | Return to work (in days) | Group A = 94.9 (SD = 24.4)<br>Group B = 67 (SD = 18.7)                                    | ---                | p < 0.05                    |                                                                                                                                                                                                                                                                                            |                         |
| <b>Wetzler et al. 1991 [46]</b><br><b>(abstract only)</b><br><b>Randomized controlled trial</b> | (A) Short leg cast for 6 weeks (n = 25)                                                                                                                                                                                     | -              | -            | +          | -        | -           | Return to work (in days) | No difference between both groups                                                         | ---                | Reported as not significant | Number of complications in both groups are not significantly different                                                                                                                                                                                                                     |                         |
|                                                                                                 | vs<br>(B) Pneumatic walker for 1 to 2 weeks and then a pneumatic ankle brace (n = 20)                                                                                                                                       | +              | +            | -          | +        | -           |                          |                                                                                           |                    |                             |                                                                                                                                                                                                                                                                                            |                         |

Results which are not used in analyses are written in italics. Complications that are not directly related to the post-operative treatment regimen and the complications with an unknown group are also written in italics.

+ = yes / present

- = no / not present
